# Supplementary material
Source: PubMed Central journal article supplement (PMC7678404)
Supplement: NIHMS1601436-supplement-Supplementary_Material.pdf [file NIHMS1601436-supplement-Supplementary_Material.pdf]

## Supplementary Material

**Supplementary Table 1** Comparison of characteristics between included and excluded cases with source of missing data shown in bold.

|                                        | <i>Excluded (%)</i> | <i>Included (%)</i> | <i>p-value</i> |
|----------------------------------------|---------------------|---------------------|----------------|
| <i>No. of cases</i>                    | 167,814             | 34,380              |                |
| <b>Missing survival data</b>           | 20,569              | -                   |                |
| <i>Year of diagnosis</i>               |                     |                     | <0.001         |
| 2004-2011                              | 136,346 (81.2)      | 24,680 (71.8)       |                |
| 2012-2013                              | 31,468 (18.8)       | 9,700 (28.2)        |                |
| <i>Age</i>                             |                     |                     | 0.002          |
| < 65y                                  | 67,012 (39.9)       | 13,414 (39)         |                |
| ≥ 65y                                  | 100,802 (60.1)      | 20,966 (61)         |                |
| <i>Gender</i>                          |                     |                     | <0.001         |
| Male                                   | 81,426 (48.5)       | 17,043 (49.6)       |                |
| Female                                 | 86,388 (51.5)       | 17,337 (50.4)       |                |
| <i>Race</i>                            |                     |                     | <0.001         |
| White                                  | 150,967 (90)        | 31,055 (90.3)       |                |
| Black                                  | 12,700 (7.6)        | 2,639 (7.7)         |                |
| Other                                  | 4,147 (2.5)         | 686 (2)             |                |
| <b>Hispanic origin</b>                 |                     |                     | 0.90           |
| Non-Hispanic                           | 148,339 (97.6)      | 33,547 (97.6)       |                |
| Hispanic                               | 3,662 (2.4)         | 833 (2.4)           |                |
| Missing                                | 15,813              | -                   |                |
| <i>Charlson/Deyo score</i>             |                     |                     | <0.001         |
| 0                                      | 96,024 (57.2)       | 18,319 (53.3)       |                |
| 1                                      | 48,774 (29.1)       | 10,690 (31.1)       |                |
| ≥ 2                                    | 23,016 (13.7)       | 5,371 (15.6)        |                |
| <i>Sequence number</i>                 |                     |                     | <0.001         |
| 0                                      | 148,339 (88.4)      | 33,547 (97.6)       |                |
| 1                                      | 18,972 (11.3)       | 740 (2.2)           |                |
| ≥ 2                                    | 503 (0.3)           | 93 (0.3)            |                |
| <b>AJCC V8 TNM stage</b>               |                     |                     | <0.001         |
| IA                                     | 380 (2.8)           | 1,367 (4)           |                |
| IB                                     | 119 (0.9)           | 537 (1.6)           |                |
| IIA                                    | 48 (0.4)            | 158 (0.5)           |                |
| IIB                                    | 257 (1.9)           | 950 (2.8)           |                |
| IIIA                                   | 445 (3.3)           | 1,704 (5)           |                |
| IIIB                                   | 212 (1.6)           | 991 (2.9)           |                |
| IIIC                                   | 60 (0.4)            | 235 (0.7)           |                |
| IVA                                    | 8,656 (64.8)        | 21,354 (62.1)       |                |
| IVB                                    | 3,172 (23.8)        | 7,084 (20.6)        |                |
| Missing                                | 154,465             | -                   |                |
| <b>Treatment</b>                       |                     |                     | <0.001         |
| No surgery, no chemo, no radiation     | 33,639 (20.6)       | 7,238 (21.1)        |                |
| No surgery, no chemo, radiation done   | 8,573 (5.2)         | 1,750 (5.1)         |                |
| No surgery, chemo done, no radiation   | 49,145 (30)         | 11,141 (32.4)       |                |
| No surgery, chemo done, radiation done | 69,508 (42.5)       | 10,951 (31.9)       |                |
| Surgery done, no chemo, no radiation   | 698 (0.4)           | 972 (2.8)           |                |

|                                                               |                |               |        |
|---------------------------------------------------------------|----------------|---------------|--------|
| <i>Surgery done, no chemo, radiation done</i>                 | 126 (0.1)      | 72 (0.2)      |        |
| <i>Surgery done, chemo done, no radiation</i>                 | 863 (0.5)      | 1,165 (3.4)   |        |
| <i>Surgery done, chemo done, radiation done</i>               | 1,096 (0.7)    | 1,091 (3.2)   |        |
| <i>Missing</i>                                                | 4,166          | -             |        |
| <i>Primary site</i>                                           |                |               | <0.001 |
| <i>C340</i>                                                   | 16,995 (10.1)  | 3,209 (9.3)   |        |
| <i>C341</i>                                                   | 73,408 (43.7)  | 15,171 (44.1) |        |
| <i>C342</i>                                                   | 6,566 (3.9)    | 1,336 (3.9)   |        |
| <i>C343</i>                                                   | 32,198 (19.2)  | 6,882 (20)    |        |
| <i>C348</i>                                                   | 3,485 (2.1)    | 685 (2)       |        |
| <i>C349</i>                                                   | 35,162 (21)    | 7,097 (20.6)  |        |
| <i>Laterality</i>                                             |                |               | <0.001 |
| <i>Not a paired site</i>                                      | 16,995 (10.1)  | 3,209 (9.3)   |        |
| <i>Only one side involved</i>                                 | 138,880 (82.8) | 28,463 (82.8) |        |
| <i>Bilateral involvement</i>                                  | 1,987 (1.2)    | 778 (2.3)     |        |
| <i>Paired site but lateral origin unknown; midline tumor</i>  | 9,952 (5.9)    | 1,930 (5.6)   |        |
| <i>Grade</i>                                                  |                |               | <0.001 |
| <i>Well differentiated</i>                                    | 286 (0.2)      | 96 (0.3)      |        |
| <i>Moderately differentiated</i>                              | 715 (0.4)      | 218 (0.6)     |        |
| <i>Poorly differentiated</i>                                  | 15,310 (9.1)   | 3,694 (10.7)  |        |
| <i>Undifferentiated</i>                                       | 39,530 (23.6)  | 6,494 (18.9)  |        |
| <i>Cell type not determined, not stated or not applicable</i> | 111,973 (66.7) | 23,878 (69.5) |        |

**Supplementary Table 2** Comparison of prognostic performance of three models in testing dataset.

| <i>Model</i>                         | <i>C-index</i> | <i>Average AUC</i> |
|--------------------------------------|----------------|--------------------|
| <i>Nomogram</i>                      | 0.722 ± 0.004  | 0.789              |
| <i>8<sup>th</sup> AJCC TNM stage</i> | 0.550 ± 0.003  | 0.634              |
| <i>Limited/extensive staging</i>     | 0.539 ± 0.002  | 0.598              |

**Supplementary Table 3** Comparison of treatment selection among 8<sup>th</sup> AJCC TNM stages in training set.

| <i>Treatment</i>                                | <i>Stage I</i> | <i>Stage II</i> | <i>Stage III</i> | <i>Stage IV</i> |
|-------------------------------------------------|----------------|-----------------|------------------|-----------------|
| <i>No surgery, no chemo, no radiation</i>       | 54 (3.2)       | 38 (3.8)        | 264 (9.9)        | 4,669 (24.1)    |
| <i>No surgery, no chemo, radiation done</i>     | 23 (1.4)       | 11 (1.1)        | 45 (1.7)         | 1,151 (5.9)     |
| <i>No surgery, chemo done, no radiation</i>     | 50 (3)         | 68 (6.8)        | 402 (15.1)       | 7,148 (36.9)    |
| <i>No surgery, chemo done, radiation done</i>   | 128 (7.7)      | 194 (19.5)      | 1,341 (50.5)     | 6,238 (32.2)    |
| <i>Surgery done, no chemo, no radiation</i>     | 526 (31.5)     | 169 (17)        | 126 (4.7)        | 35 (0.2)        |
| <i>Surgery done, no chemo, radiation done</i>   | 20 (1.2)       | 15 (1.5)        | 17 (0.6)         | 12 (0.1)        |
| <i>Surgery done, chemo done, no radiation</i>   | 561 (33.6)     | 236 (23.8)      | 152 (5.7)        | 51 (0.3)        |
| <i>Surgery done, chemo done, radiation done</i> | 308 (18.4)     | 262 (26.4)      | 311 (11.7)       | 55 (0.3)        |

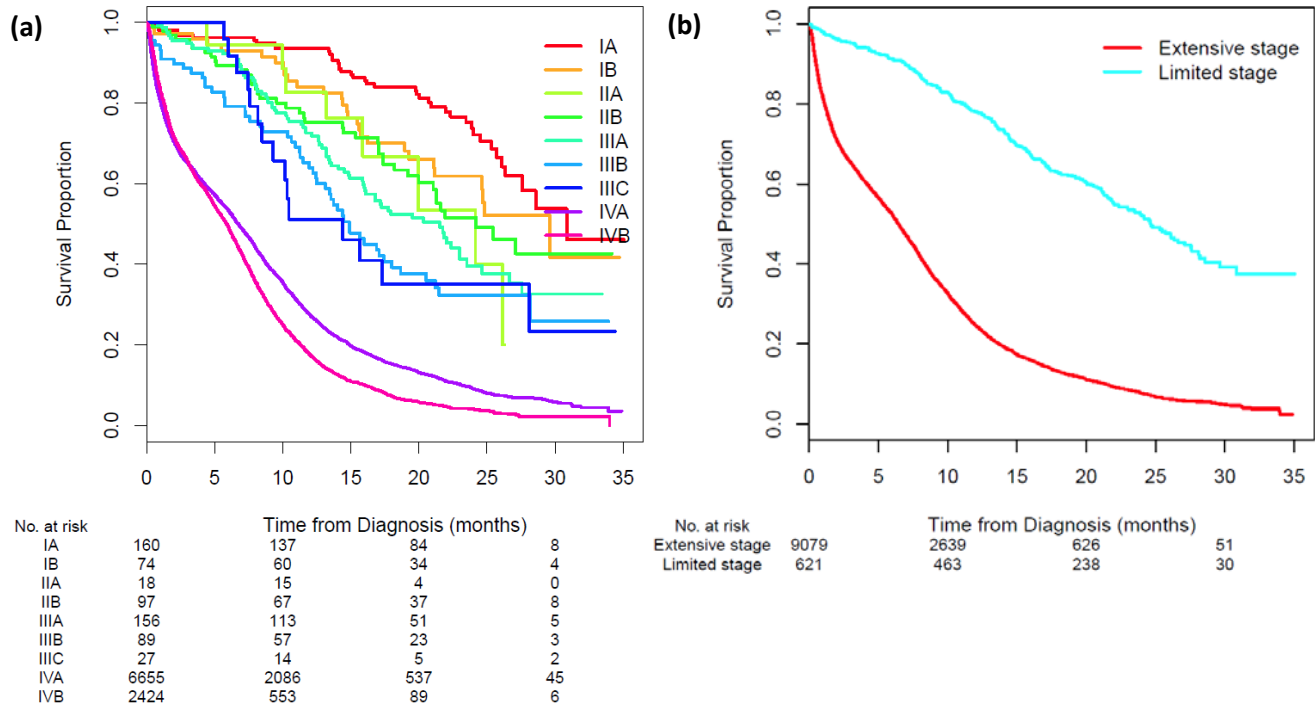

**Supplementary Figure 1.** Prognostic performance for AJCC 8<sup>th</sup> edition TNM staging system and limited/extensive staging system. (a) K-M plot grouped by AJCC 8<sup>th</sup> edition TNM stages. (b) K-M plot grouped by limited/extensive stages.

| <i>Score</i> | <i>#patients</i> | <i>#events</i> | <i>Median survival (mos)</i> | <i>HR</i>                            | <i>p-value</i> |
|--------------|------------------|----------------|------------------------------|--------------------------------------|----------------|
| $\leq 8$     | 25               | 5              | NA (NA-NA)                   | -                                    | -              |
| (8,10]       | 250              | 118            | 23.16 (18.92-29.11)          | $\leq 8$ vs (2,8]: 2.53 (1.03-6.2)   | 0.04           |
| (10,12]      | 4452             | 2577           | 16.79 (16.13-17.54)          | (10,12] vs (8,10]: 1.37 (1.14-1.64)  | < 0.001        |
| (12,14]      | 3608             | 2694           | 10.05 (9.72-10.41)           | (12,14] vs (10,12]: 1.82 (1.72-1.92) | < 0.001        |
| (14,16]      | 698              | 544            | 5.55 (4.76-6.70)             | (14,16] vs (12,14]: 1.5 (1.37-1.64)  | < 0.001        |
| (16,18]      | 1473             | 1192           | 1.94 (1.71-2.20)             | (16,18] vs (14,16]: 1.52 (1.37-1.68) | < 0.001        |
| > 18         | 514              | 457            | 1.12 (0.99-1.35)             | > 18 vs (16,18]: 1.41 (1.26-1.57)    | < 0.001        |

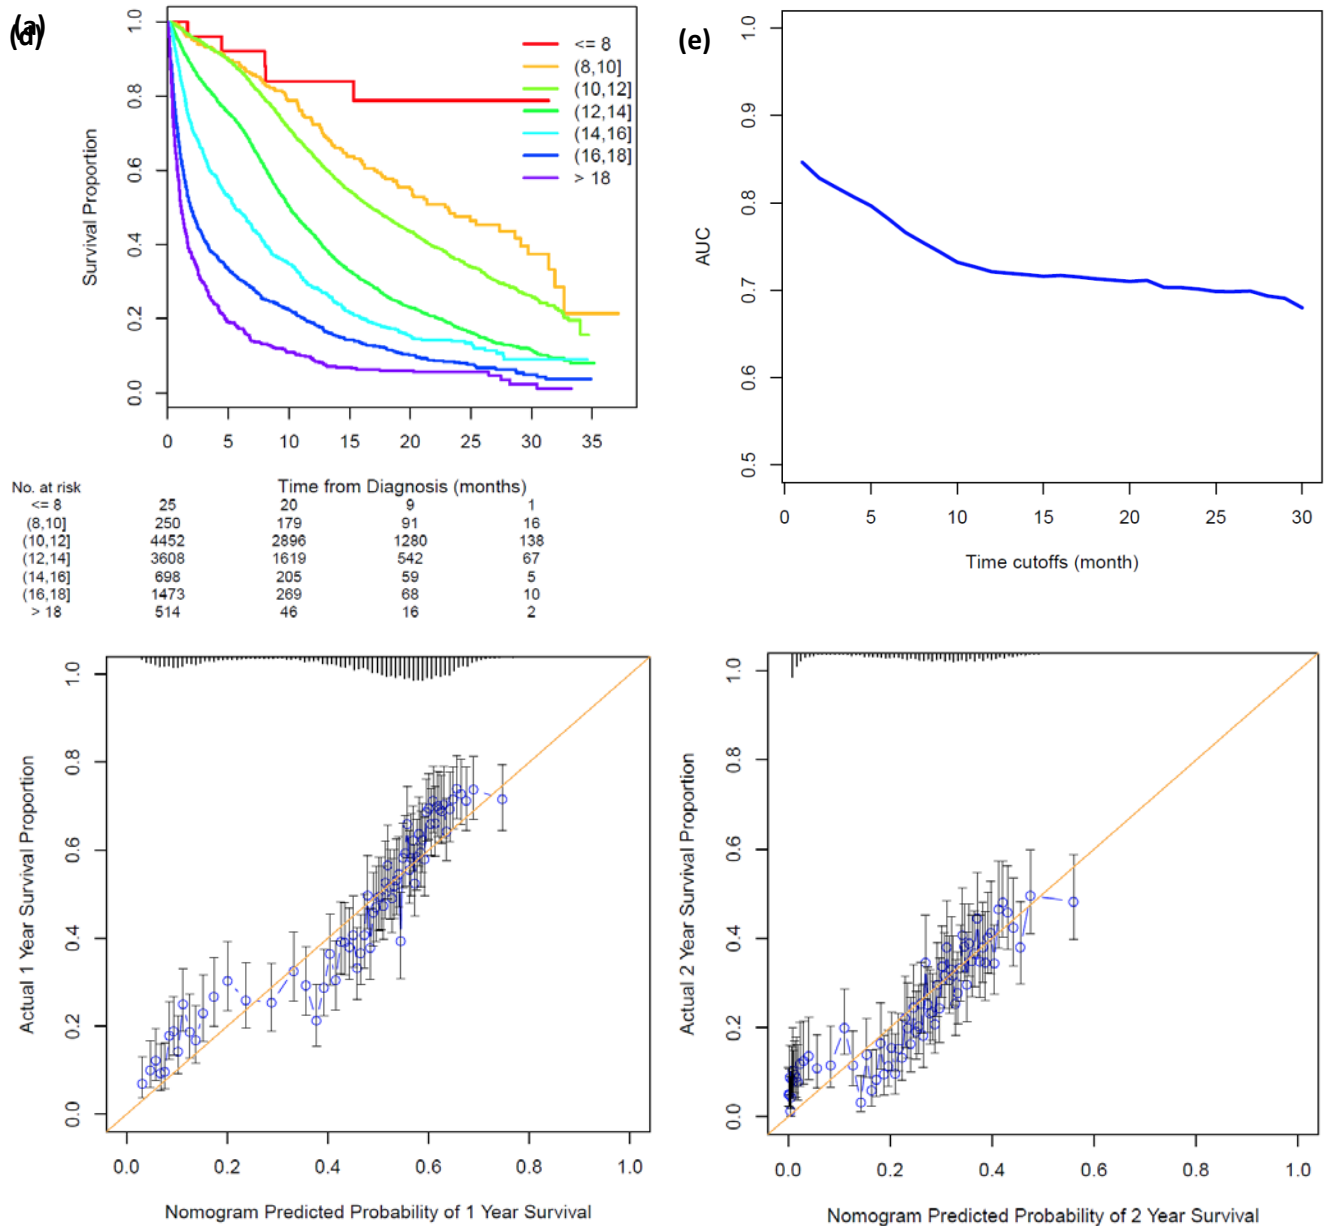

**Supplementary Figure 2** Sensitivity analysis of bias introduced by missing data. Excluded data with diagnostic time ranging from year 2012 to 2013 were used. Missed variables were imputed using mode in the training cohort. **(a)** Risk scores of testing set cases were calculated according to the model in Figure 1 and grouped into 8 subgroups. K-M plot was depicted for each group. **(b)** Summary of groups in (a). Hazard Ratio (HR) was calculated using Coxph regression model between each two adjacent lines. P-value was calculated using Wald test. **(c)** Area under the curve (AUC) was calculated for the proposed nomogram for every month from the 1<sup>st</sup> to the 30<sup>th</sup> month. **(d, e)** Calibration curves compare predicted and actual survival proportions at 1 year (d) and 2 years (e), separately. Distributions of predicted survival probabilities are plotted at the top. Error bars represent 95% confidence intervals.
